# Supplementary material for: Ferrocene analogs of Brooker's merocyanine: a new library of organometallic inverted solvatochromic dyes
Source: Royal Society of Chemistry journal article supplement (doi:10.1039/d3qo00648d), 2023-01-01
Supplement: d3qo00648d1.pdf [file d3qo00648d1.pdf]

## Ferrocene analogues of Brooker's Merocyanine: A new library of organometallic inverted solvatochromic dyes

Ignacio Aburto,<sup>a</sup> Fabián Martínez-Gómez,<sup>a</sup> Carolina Aliaga<sup>a,b</sup> and Moisés Domínguez\*<sup>a</sup>

<sup>a</sup>Facultad de Química y Biología, Universidad de Santiago de Chile, Av. B.O'Higgins, 3363 Santiago, Chile. E-

<sup>b</sup>Centro para el Desarrollo de la Nanociencia y la Nanotecnología, CEDENNA, Chile

mail: [moises.dominguez@usach.cl](mailto:moises.dominguez@usach.cl)

### Supplemental material

#### Contents

|                                                                                        |     |
|----------------------------------------------------------------------------------------|-----|
| 1. Characterization data of dye <b>3–6</b> .....                                       | p2  |
| 2. Solvatochromic plots $E_T$ vs. $E_T^N$ .....                                        | p4  |
| 3. Catalán equations obtained for the solvatochromism of dyes <b>3–6</b> .....         | p6  |
| 4. Copies of the $^1\text{H}$ and $^{13}\text{C}$ NMR spectra of dyes <b>3–6</b> ..... | p7  |
| 5. NMR Studies at different temperatures for dye <b>3</b> .....                        | p11 |
| 6. EPR spectra of dyes <b>3–6</b> in water solution.....                               | p14 |
| 7. Frontier molecular orbitals of dyes <b>5</b> and <b>6</b> in water solution.....    | p16 |
| 8. Dihedral angles of the optimized dyes <b>3–6</b> water solution.....                | p17 |
| 9. Absorbance measurements of dyes <b>3–6</b> in protic solvents.....                  | p18 |
| 10. Absorption coefficients of dyes <b>3–6</b> in protic solvents.....                 | p24 |
| 11. References.....                                                                    | p26 |

# 1. Characterization data of dye 3–6

## 1.1 General methods

All NMR measurements were recorded on a Bruker Avance NEO 400 spectrometer (Bellerica, MA, USA) operating at 400.13 MHz ( $^1\text{H}$ ) and 100.62 MHz ( $^{13}\text{C}$ ). No D-NMR experiments were carried out turning off the lock option. Tuning process was accomplished by automatization, meanwhile shimming was carried out manually, adjusting Z1 to Z4 until finding the maximum area for the signals. For the fine adjustment, X, Y, XY and YZ were used. All experiments were carried out using 32 scans (ns), 4 dummy scans (ds) and a 64K time domain (TD). IR spectra were recorded with a Spectrum Two FT-IR (ATR) Perkin Elmer spectrophotometer HRMS was performed with Varian Ionspec QFT-7 (ESI-FT ICRMS) and Agilent 6210 ESI-TOF instruments. Melting points were recorded with a Microthermal capillary melting-point apparatus and were not corrected. All reagents were reagent grade and were used without further purification. TLC was performed on TLC plates (silica gel 60, fluorescence indicator F254, 0.25 mm layer thickness). Products were purified by recrystallization from ethanol.

UV–Vis spectra were recorded on a diode array UV–vis near IR Specord S 600 (Maximum recording speed for complete spectra: 12 msec) at a room temperature of  $23 \pm 1$  °C. The molar concentration of the dyes in the solutions employed during UV–vis measurements were *ca.*  $3 \times 10^{-5}$  mol/L.

## 1.2 Synthetic procedures

### *N*-methylation of azaheterocycles with methyl triflate; General procedure 1.

MeOTf (1.5 mmol) was added dropwise to a stirred solution of the corresponding pyridine derivative (1.0 mmol) in dry dichloromethane (5.0 mL) under an argon atmosphere at room temperature. The resulting mixture was stirred during 2 h. After this time, the solid product was filtered off and dried under vacuum.

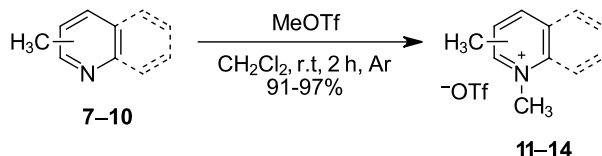

**1,4-Dimethylpyridinium triflate 11.** Colorless solid, 91% yield (234 mg).  $^1\text{H}$  NMR (400 MHz,  $\text{DMSO-}d_6$ )  $\delta$ : 8.67 (d,  $J = 6.6$  Hz, 2H), 7.81 (d,  $J = 6.2$  Hz, 2H), 4.14 (s, 3H), 2.47 (s, 3H) ppm. The analytical data match those reported in the literature.<sup>1</sup>

**1,4-Dimethylquinolinium triflate 13.** Colorless solid, 94% yield (289 mg), mp. 113–115 °C (lit.<sup>4</sup> 114.6 °C).  $^1\text{H}$  NMR (400 MHz,  $\text{DMSO-}d_6$ )  $\delta$ : 9.30 – 9.19 (m, 1H), 8.46 (d,  $J = 8.4$  Hz, 1H), 8.41 (d,  $J = 8.9$  Hz, 1H), 8.23 – 8.15 (m, 1H), 8.02 – 7.93 (m, 2H), 4.50 (s, 3H), 2.93 (s, 3H) ppm. The analytical data match those reported in the literature.<sup>4</sup>

**1,2-Dimethylpyridinium triflate 12.** Colorless solid, 93% yield (239 mg).  $^1\text{H}$  NMR (400 MHz,  $\text{DMSO-}d_6$ )  $\delta$ : 8.91 – 8.86 (m, 1H), 8.44 – 8.35 (m, 1H), 8.02 – 7.95 (m, 1H), 7.92 – 7.83 (m, 1H), 4.17 (s, 3H), 2.73 (s, 3H) ppm. The analytical data match those reported in the literature.<sup>2,3</sup>

**1,2-Dimethylquinolinium 14.** Colorless solid, 97% yield (298 mg).  $^1\text{H}$  NMR (400 MHz,  $\text{DMSO-}d_6$ )  $\delta$ : 9.02 (d,  $J = 8.6$  Hz, 1H), 8.58 – 8.48 (m, 1H), 8.38 – 8.30 (m, 1H), 8.22 – 8.12 (m, 1H), 8.04 (d,  $J = 8.6$  Hz, 1H), 7.96 – 7.88 (m, 1H), 4.38 (s, 3H), 3.01 (s, 3H) ppm. The analytical data match those reported in the literature.<sup>5</sup>

### Condensation reactions with ferrocencarboxaldehyde; General procedure 2.

Under argon atmosphere, a mixture of the pyridinium salt (1.0 mmol), ferrocencarboxaldehyde (1.5 mmol) and a catalytic amount piperidine (1.0  $\mu$ L) in dry and degassed ethanol (5 mL) was refluxed at 80 °C for 6 hours. After completion of the reaction as was noticed by TLC (EtOAc), the reaction mixture was cooled down to 0 °C overnight. The desired products **3–6** were obtained as deeply colored solids after vacuum filtration.

**(E)-1-methyl-4-[2-(ferrocene-2-yl)ethenyl]pyridinium triflate 3.** Purple solid, 70% yield (340 mg), mp. 217–218 °C.  $^1\text{H}$  NMR (400 MHz, DMSO- $d_6$ )  $\delta$ : 8.73 (d,  $J$  = 6.6 Hz, 2H), 8.06 (d,  $J$  = 6.5 Hz, 2H), 7.88 (d,  $J$  = 16.0 Hz, 1H), 6.97 (d,  $J$  = 16.0 Hz, 1H), 5.04 – 4.65 (m, 2H), 4.65 – 4.48 (m, 2H), 4.23 (s, 5H), 4.18 (s, 3H) ppm.  $^{13}\text{C}$  NMR (101 MHz, DMSO- $d_6$ )  $\delta$ : 153.0, 145.2, 143.6, 122.9, 120.3, 80.5, 72.0, 70.2, 69.2, 47.0 ppm.  $^{19}\text{F}$  NMR (376 MHz, DMSO- $d_6$ )  $\delta$ : -78.99 ppm. FT-IR (ATR)  $\nu$ : 3055, 1604, 1518, 1253, 1138, 981, 820, 633  $\text{cm}^{-1}$ . HRMS (ESI-TOF):  $m/z$  [ $\text{M} + \text{H}^+$ ] calcd for  $\text{C}_{20}\text{H}_{26}\text{FeN}^+$ : 336.1407; found: 336.1418.

**(E)-1-methyl-4-[2-(ferrocene-2-yl)ethenyl]quinolinium triflate 4.** Purple solid, 78% yield (535 mg), mp. 225–226 °C.  $^1\text{H}$  NMR (400 MHz, DMSO- $d_6$ )  $\delta$ : 9.36 – 9.09 (m, 1H), 9.05 – 8.80 (m, 1H), 8.46 – 8.36 (m, 2H), 8.32 – 7.95 (m, 3H), 7.84 (d,  $J$  = 15.6 Hz, 1H), 5.19 – 4.95 (m, 2H), 4.86 – 4.61 (m, 2H), 4.46 (s, 3H), 4.27 (s, 5H) ppm.  $^{13}\text{C}$  NMR (101 MHz, DMSO- $d_6$ )  $\delta$ : 152.7, 147.9, 146.6, 139.4, 135.2, 129.4, 126.7, 126.0, 119.6, 116.6, 115.2, 81.0, 72.6, 70.4, 70.0, 44.8 ppm.  $^{19}\text{F}$  NMR (376 MHz, DMSO- $d_6$ )  $\delta$ : -78.99 ppm. FT-IR (ATR)  $\nu$ : 3062, 1587, 1560, 1255, 1160, 1024, 759, 632  $\text{cm}^{-1}$ . HRMS (ESI-TOF):  $m/z$  [ $\text{M} + \text{H}^+$ ] calcd for  $\text{C}_{24}\text{H}_{28}\text{FeN}^+$ : 386.1562; found: 386.1571.

**(E)-1-methyl-2-[2-(ferrocene-2-yl)ethenyl]pyridinium triflate 5.** Purple solid, 30% yield (146 mg), mp. 185–186 °C.  $^1\text{H}$  NMR (400 MHz, DMSO- $d_6$ )  $\delta$ : 8.78 (d,  $J$  = 6.3 Hz, 1H), 8.52 – 8.31 (m, 2H), 7.90 – 7.71 (m, 2H), 7.07 (d,  $J$  = 15.5 Hz, 1H), 4.90 – 4.84 (m, 2H), 4.68 – 4.60 (m, 2H), 4.27 (s, 5H), 4.25 (s, 3H) ppm.  $^{13}\text{C}$  NMR (101 MHz, DMSO- $d_6$ )  $\delta$ : 153.0, 145.99, 145.96, 144.1, 124.6, 124.1, 113.9, 80.1, 72.2, 70.3, 69.6, 46.2 ppm.  $^{19}\text{F}$  NMR (376 MHz, DMSO- $d_6$ )  $\delta$ : -78.99 ppm. FT-IR (ATR)  $\nu$ : 3097, 1607, 1564, 1445, 1260, 1174, 1028, 771, 634  $\text{cm}^{-1}$ . HRMS (ESI-TOF):  $m/z$  [ $\text{M} + \text{H}^+$ ] calcd for  $\text{C}_{20}\text{H}_{26}\text{FeN}^+$ : 336.1407; found: 336.1411.

**(E)-1-methyl-2-[2-(ferrocene-2-yl)ethenyl]quinolinium triflate 6.** Purple solid, 37% yield (198 mg), mp. 160–161 °C.  $^1\text{H}$  NMR (400 MHz, DMSO- $d_6$ )  $\delta$ : 8.93 (d,  $J$  = 8.9 Hz, 1H), 8.59 – 8.42 (m, 2H), 8.30 (d,  $J$  = 7.9 Hz, 1H), 8.23 (d,  $J$  = 15.4 Hz, 1H), 8.18 – 8.06 (m, 1H), 7.99 – 7.81 (m, 1H), 7.40 (d,  $J$  = 15.4 Hz, 1H), 5.08 – 4.98 (m, 2H), 4.80 – 4.74 (m, 2H), 4.42 (s, 3H), 4.32 (s, 5H) ppm.  $^{13}\text{C}$  NMR (101 MHz, DMSO- $d_6$ )  $\delta$ : 156.2, 151.6, 143.3, 139.6, 135.0, 130.4, 128.9, 127.6, 121.1, 119.5, 115.5, 80.1, 73.4, 70.7, 70.4, 69.9, 66.8 ppm.  $^{19}\text{F}$  NMR (376 MHz, DMSO- $d_6$ )  $\delta$ : -78.99 ppm. FT-IR (ATR)  $\nu$ : 3093, 1590, 1520, 1453, 1254, 1151, 1026, 820, 634  $\text{cm}^{-1}$ . HRMS (ESI-TOF):  $m/z$  [ $\text{M} + \text{H}^+$ ] calcd for  $\text{C}_{24}\text{H}_{28}\text{FeN}^+$ : 386.1562; found: 386.1568.

### 1.3 Computational details

The molecular structures of **3–6** were optimized at the Becke-Lee-Yang-Parr B3LYP density-functional level of theory (DFT)<sup>6,7</sup> employing the triple- $\xi$  Karlsruhe basis set (def2-TZVP).<sup>8</sup> Dispersion forces were accounted for with Grimme's D3 correction.<sup>9</sup> Frequencies were calculated for all molecules in order to ensure energy minima. The electronic transition energy were calculated over the optimized structures with the TDDFT method at the Becke-Lee-Yang-Parr B3LYP level of theory employing the quadruple- $\xi$  Karlsruhe basis set (def2-TZVP).<sup>8</sup> The solvent effect for dichloromethane solution was included by employing the implicit CPCM solvation model.<sup>10,11</sup> The RI<sup>12,13</sup> and the Chain of Spheres<sup>14</sup> approximations were employed to speed up the optimization and spectrum calculation respectively. All the calculations were carried out in ORCA 5.0.3.<sup>15</sup>

## 2. Solvatochromic plots $E_T$ vs. $E_T^N$

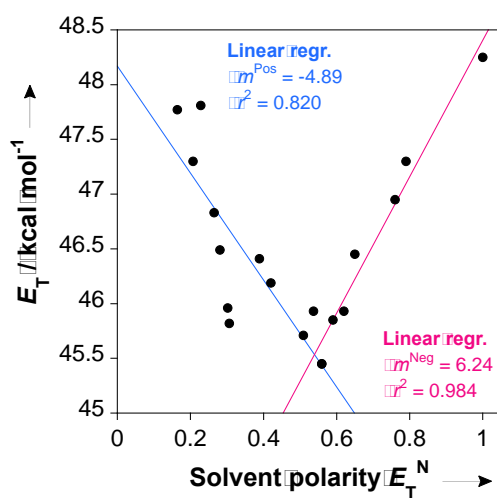

**Fig. S1** Variations in the electronic transition energy  $E_T$  of dye 4 as a function of normalized solvent polarity values  $E_T^N$  and the linear regression of the positive (blue) and negative (pink) parts of its general solvatochromic inverted profile.

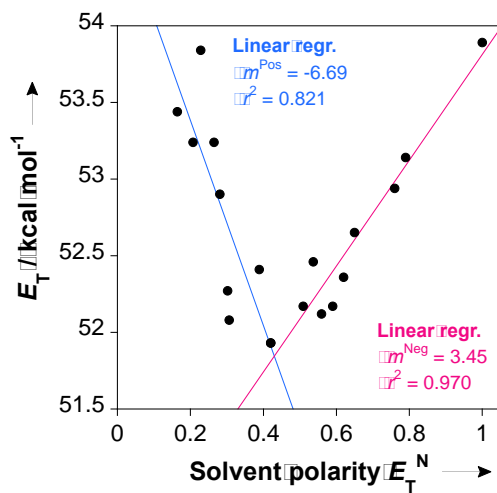

**Fig. S2** Variations in the electronic transition energy  $E_T$  of dye 5 as a function of normalized solvent polarity values  $E_T^N$  and the linear regression of the positive (blue) and negative (pink) parts of its general solvatochromic inverted profile.

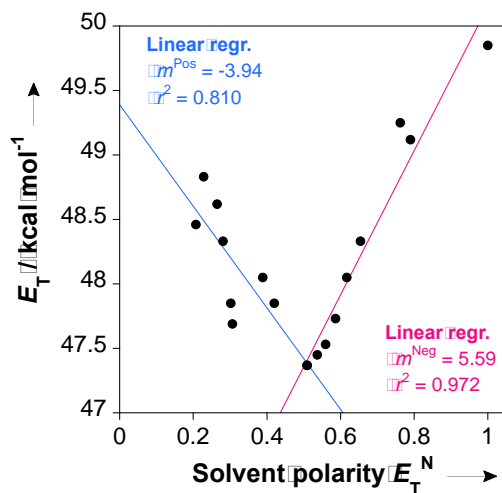

**Fig. S3** Variations in the electronic transition energy  $E_T$  of dye **6** as a function of normalized solvent polarity values  $E_T^N$  and the linear regression of the positive (blue) and negative (pink) parts of its general solvatochromic inverted profile.

**Table S1.** Linear regressions obtained for dyes **3–6**, and polarity at where solvatochromic inversion takes place.

| Dye      | Equations                   |                            | $E_T^N$ inversion |
|----------|-----------------------------|----------------------------|-------------------|
|          | Positive solvatochromism    | Negative solvatochromism   |                   |
| <b>3</b> | $E_T = 55.09 - 13.83 E_T^N$ | $E_T = 49.46 + 2.77 E_T^N$ | 0.339             |
| <b>4</b> | $E_T = 48.17 - 4.89 E_T^N$  | $E_T = 42.17 + 6.24 E_T^N$ | 0.539             |
| <b>5</b> | $E_T = 54.72 - 6.69 E_T^N$  | $E_T = 50.36 + 3.45 E_T^N$ | 0.430             |
| <b>6</b> | $E_T = 49.39 - 3.94 E_T^N$  | $E_T = 44.56 + 5.59 E_T^N$ | 0.507             |

### 3. Catalán's equations obtained for the solvatochromism of dyes 3–6

**Table S2.** Catalán's equations obtained for the positive and negative solvatochromic part of the general inverted solvatochromic curve of dyes 3–6.

| Dye      | Equations                          |               |                          |               |
|----------|------------------------------------|---------------|--------------------------|---------------|
|          | Positive solvatochromism           |               | Negative solvatochromism |               |
| <b>3</b> | $E_T = 59.17 - 8.04 SP - 2.28 SdP$ | $r^2 = 0.972$ | $E_T = 50.24 + 1.91 SA$  | $r^2 = 0.984$ |
| <b>4</b> | $E_T = 55.38 - 3.34 SB - 9.11 SP$  | $r^2 = 0.861$ | $E_T = 41.90 + 5.92 SdP$ | $r^2 = 0.951$ |
| <b>5</b> | $E_T = 61.77 - 3.24 SB - 9.57 SP$  | $r^2 = 0.919$ | $E_T = 51.66 + 2.08 SA$  | $r^2 = 0.975$ |
| <b>6</b> | $E_T = 53.71 - 2.00 SB - 5.83 SP$  | $r^2 = 0.947$ | $E_T = 44.95 + 4.60 SdP$ | $r^2 = 0.960$ |

#### 4. Copies of the $^1\text{H}$ and $^{13}\text{C}$ NMR spectra of dyes 3–6

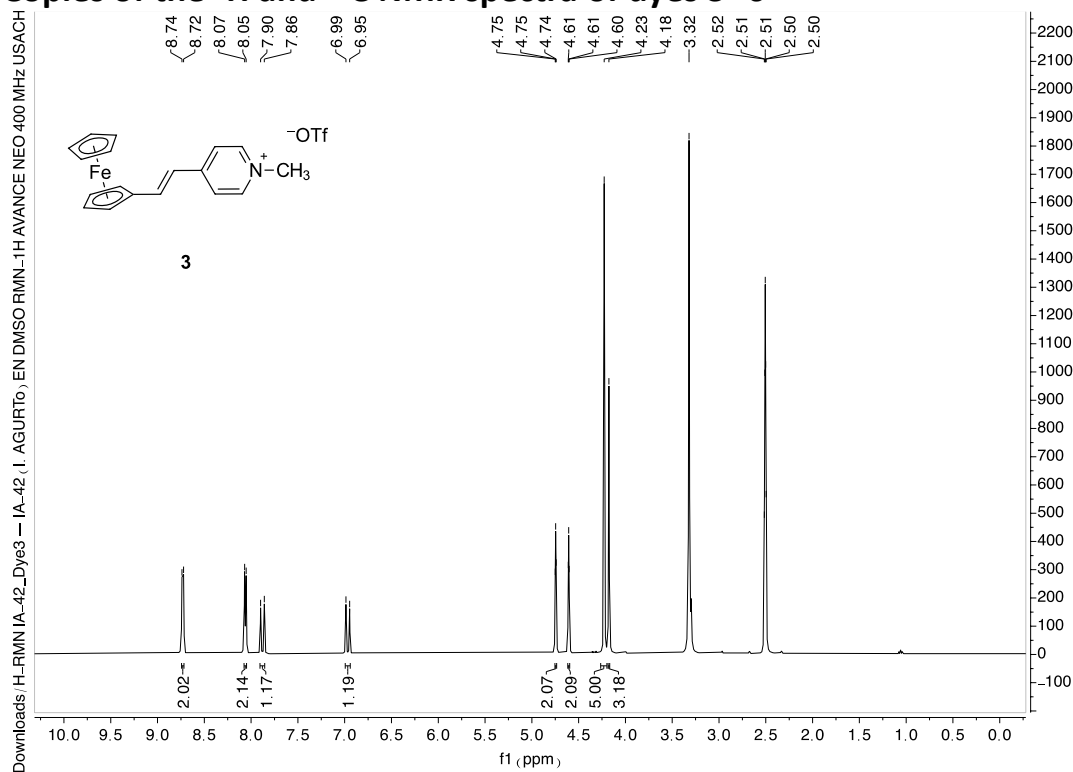

Fig. S4  $^1\text{H}$  NMR spectrum of dye 3 recorded in  $\text{DMSO-}d_6$ .

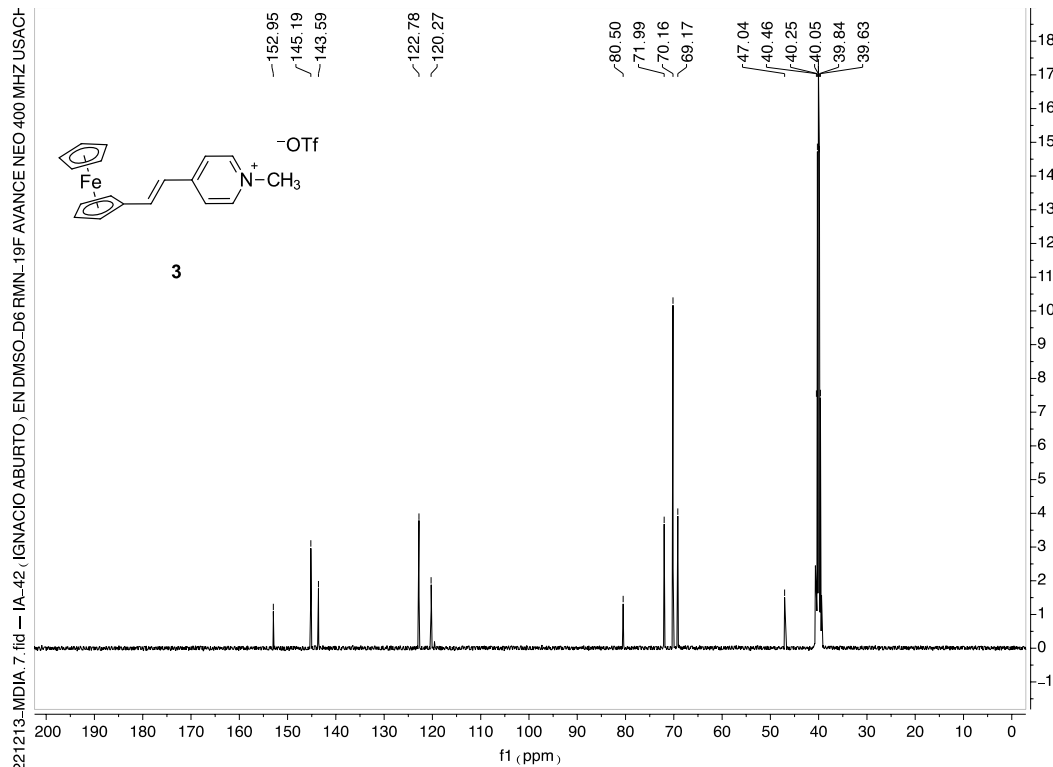

Fig. S5  $^{13}\text{C}$  NMR spectrum of dye 3 recorded in  $\text{DMSO-}d_6$ .

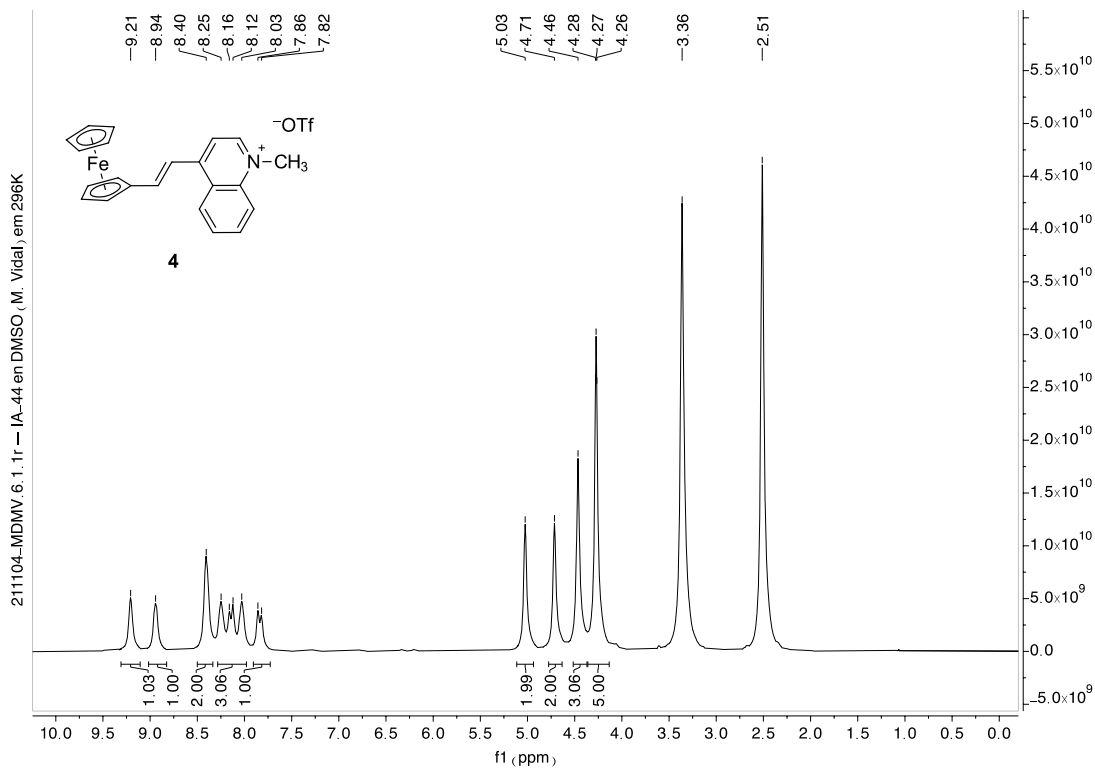

Fig. S6  $^1\text{H}$  NMR spectrum of dye 4 recorded in  $\text{DMSO-}d_6$ .

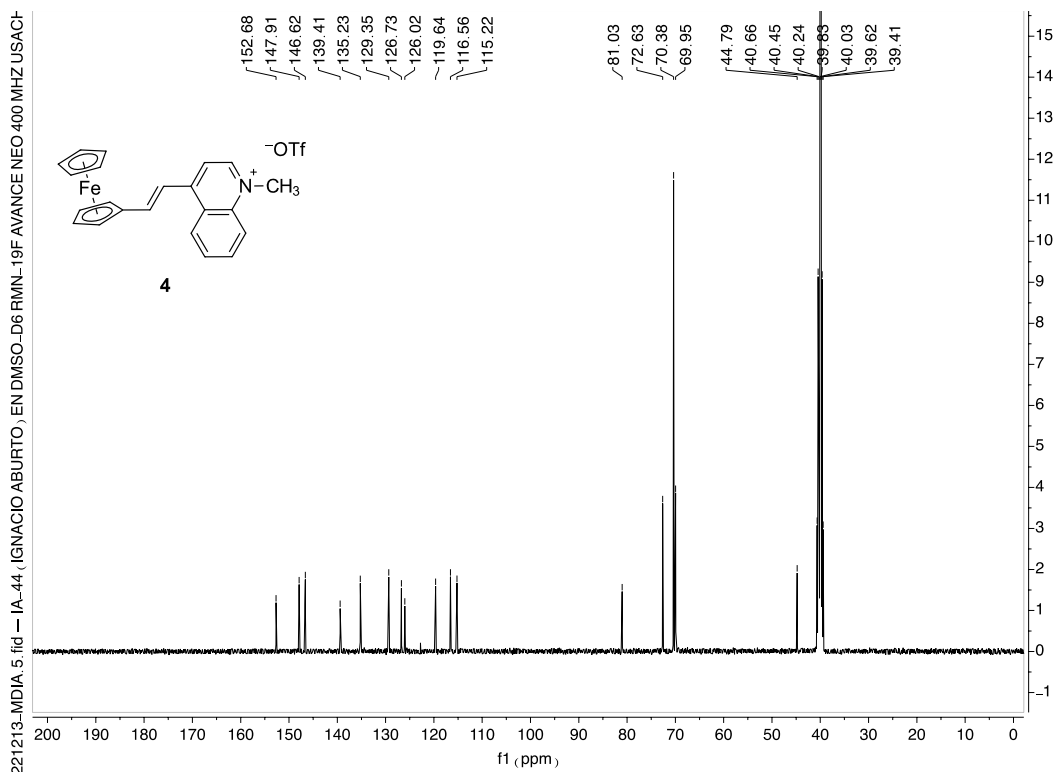

Fig. S7  $^{13}\text{C}$  NMR spectrum of dye 4 recorded in  $\text{DMSO-}d_6$ .



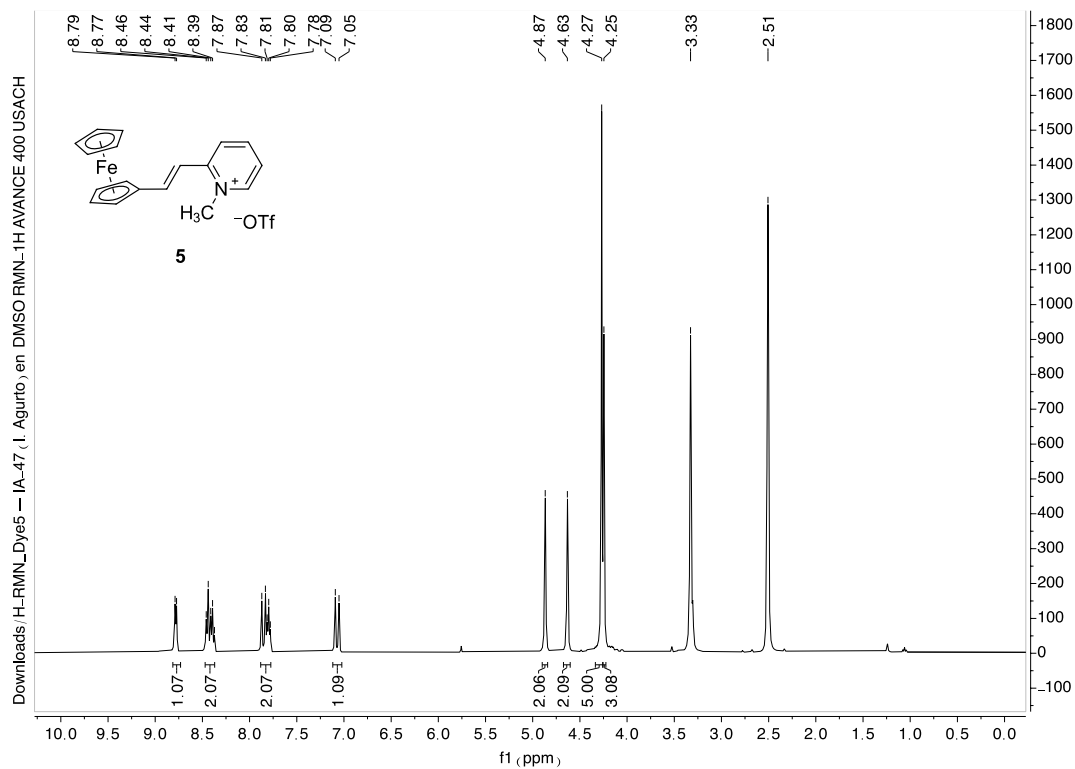

Fig. S8  $^1\text{H}$  NMR spectrum of dye 5 recorded in  $\text{DMSO-}d_6$ .

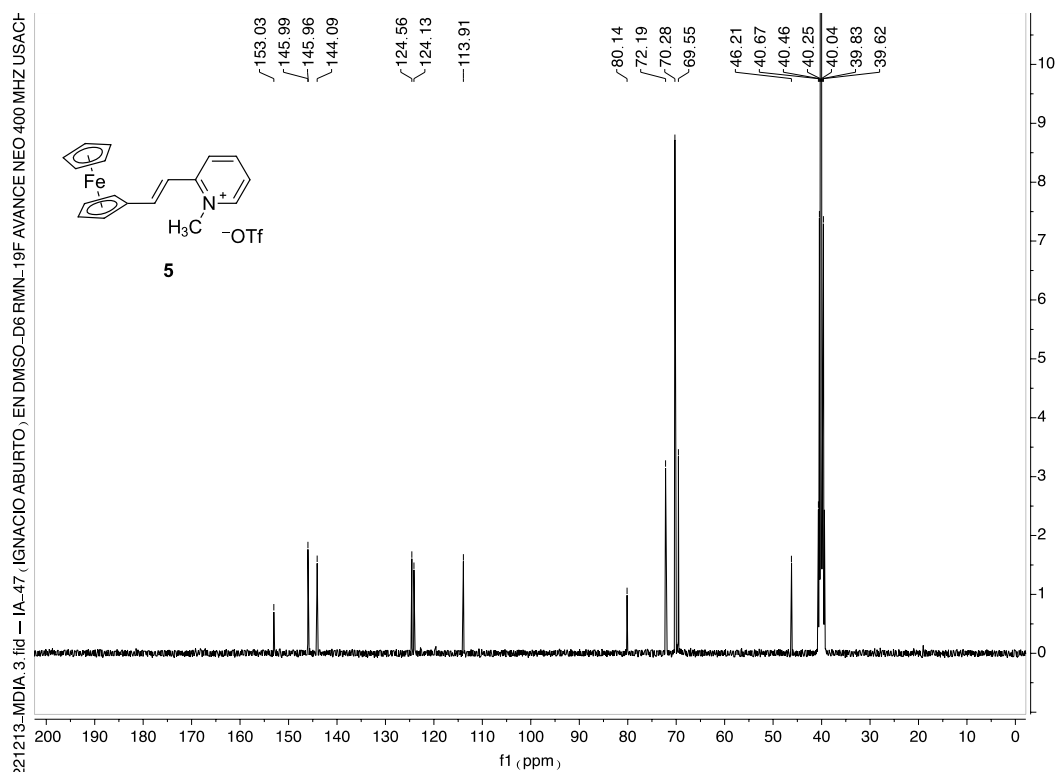

Fig. S9  $^{13}\text{C}$  NMR spectrum of dye 5 recorded in  $\text{DMSO-}d_6$ .

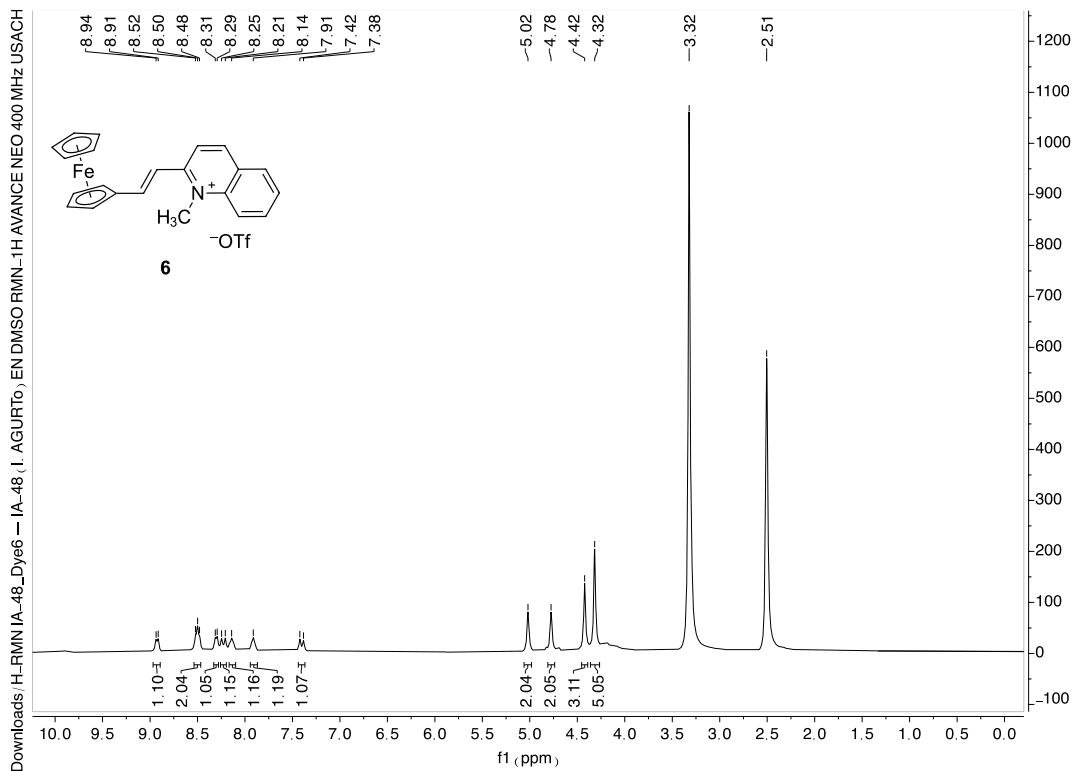

Fig. S10  $^1\text{H}$  NMR spectrum of dye **6** recorded in  $\text{DMSO-}d_6$ .

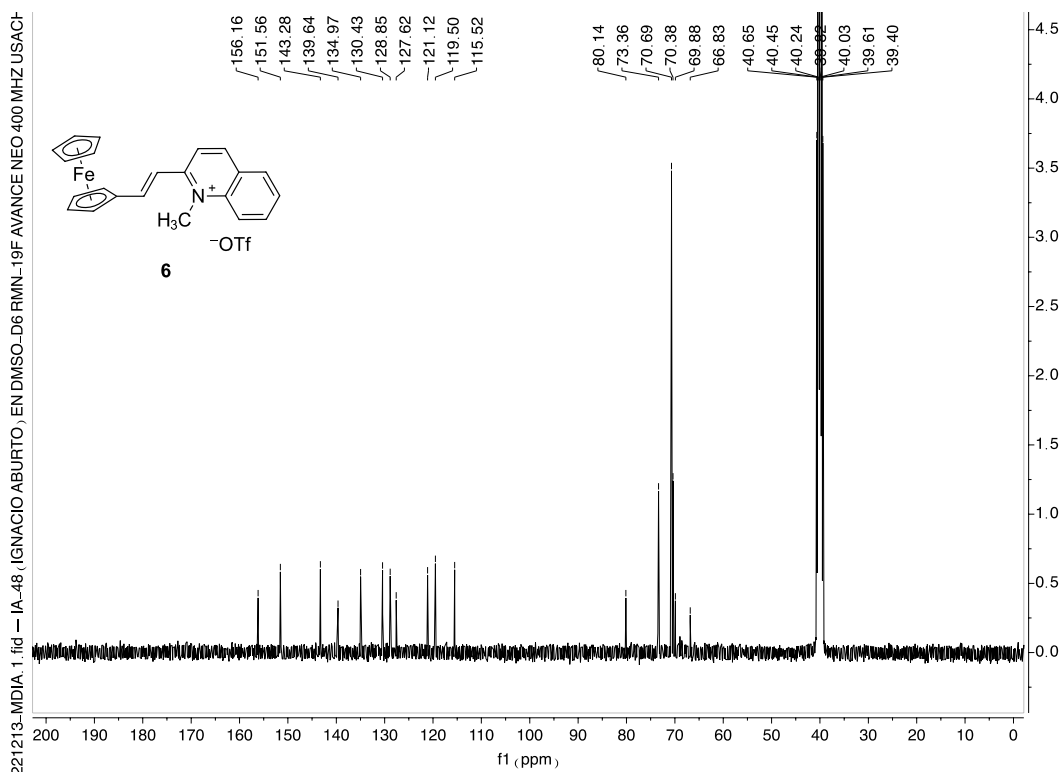

Fig. S11  $^{13}\text{C}$  NMR spectrum of dye **6** recorded in  $\text{DMSO-}d_6$ .

## 5. NMR Studies at different temperatures for dye 3

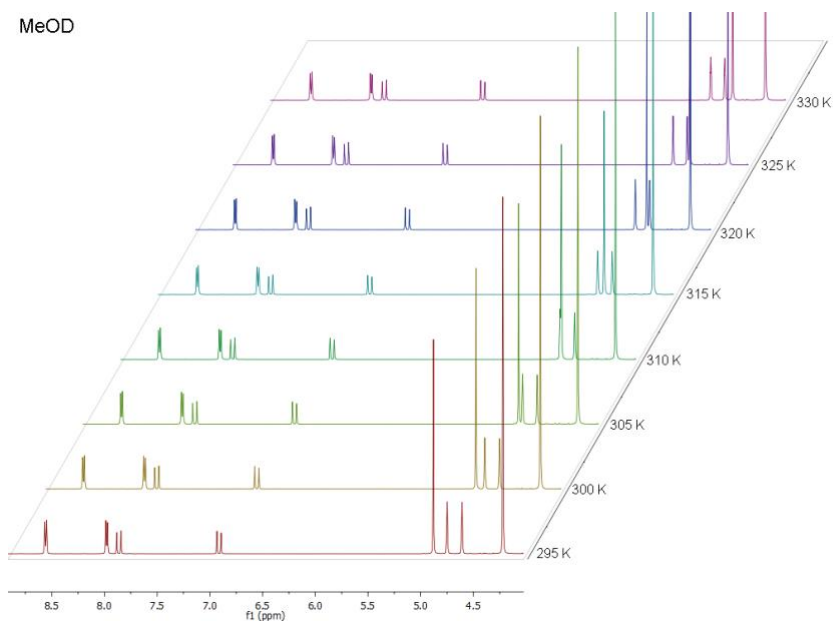

**Fig. S12** Variation of the <sup>1</sup>H NMR signals of dye 3 in CD<sub>3</sub>OD solution at different temperatures.

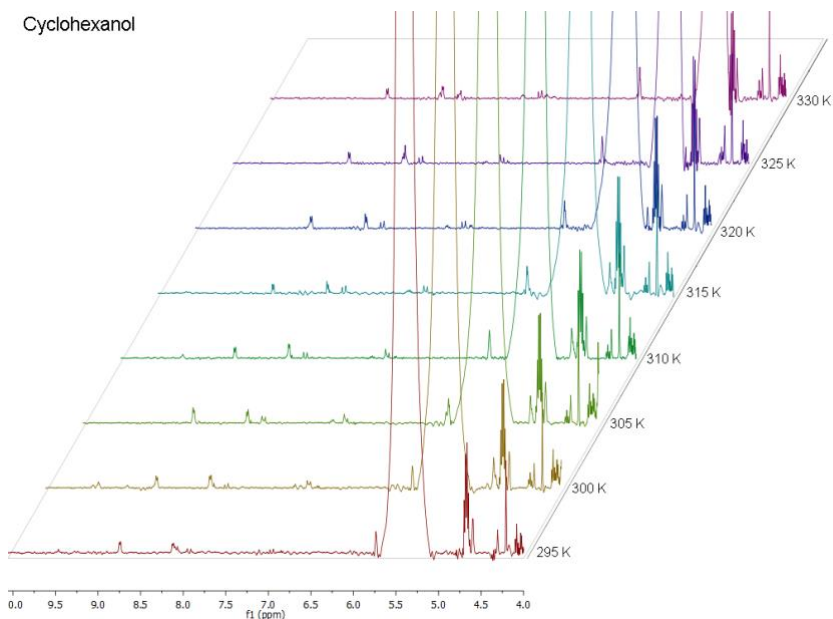

**Fig. S13** Variation of the No-D <sup>1</sup>H NMR signals of dye 3 in cyclohexanol solution at different temperatures.

Ethyl acetate

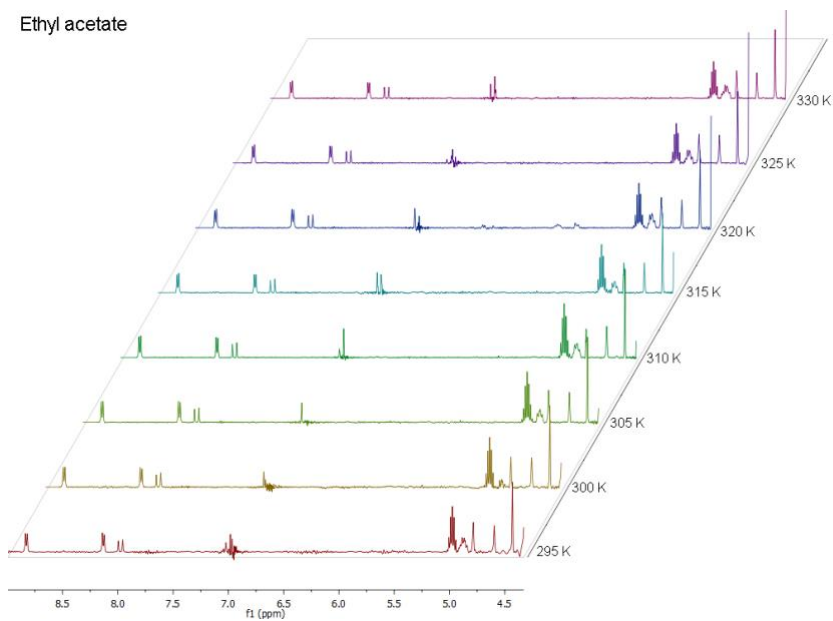

**Fig. S14** Variation of the No-D <sup>1</sup>H NMR signals of dye **3** in ethyl acetate solution at different temperatures.

THF

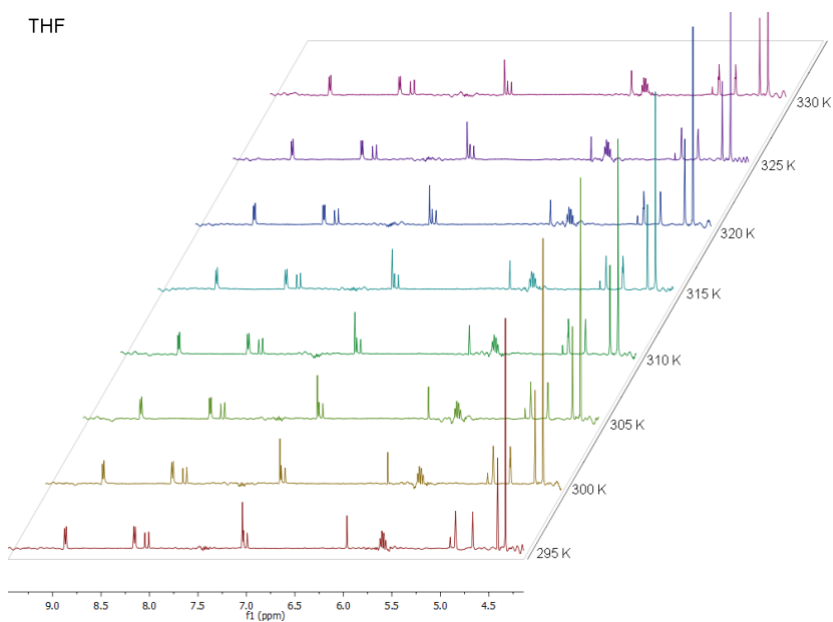

**Fig. S15** Variation of the No-D <sup>1</sup>H NMR signals of dye **3** in tetrahydrofuran solution at different temperatures.

**Table S3.** Coupling constant in Hz of the ethylene bridge hydrogens of dye **3** at different temperatures in Kelvin.

| Temperature | D <sub>2</sub> O | CD <sub>3</sub> OD | No-D CyOH | No-D EtOAc | No-D THF |
|-------------|------------------|--------------------|-----------|------------|----------|
| 295         | 16.00            | 15.95              | 15.92     | 16.10      | 15.98    |
| 300         | 16.01            | 15.92              | 15.69     | 15.91      | 15.97    |
| 305         | 16.03            | 15.93              | 15.63     | 16.02      | 15.85    |
| 310         | 15.98            | 15.91              | 15.94     | 16.04      | 16.00    |
| 315         | 15.98            | 15.94              | 16.09     | 16.07      | 15.96    |
| 320         | 15.98            | 15.94              | 15.67     | 16.05      | 16.00    |
| 325         | 15.99            | 15.91              | 16.06     | 15.95      | 16.00    |
| 330         | 16.02            | 15.91              | 16.86     | 16.05      | 15.98    |
| 335         | 15.96            | –                  | –         | –          | –        |
| 340         | 15.97            | –                  | –         | –          | –        |

## 6. EPR spectra of dyes 3–6 in water solution.

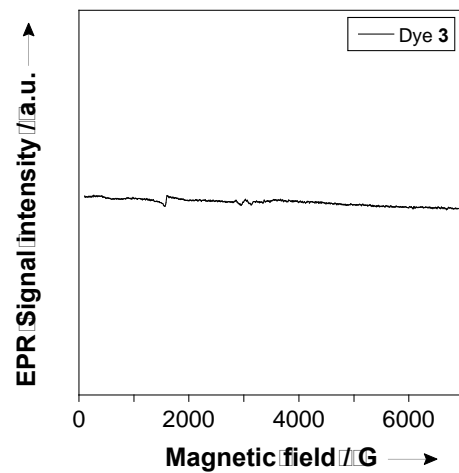

Fig. S16 EPR spectra of dye 3 in water solution.

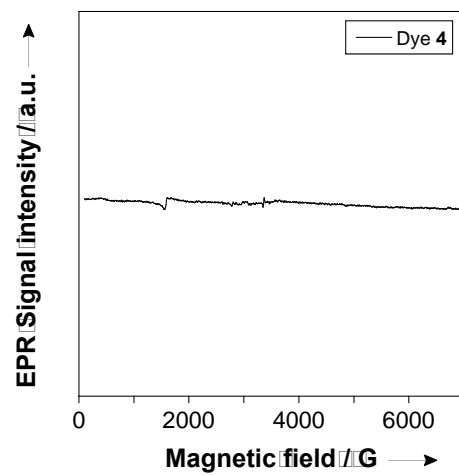

Fig. S17 EPR spectra of dye 4 in water solution.

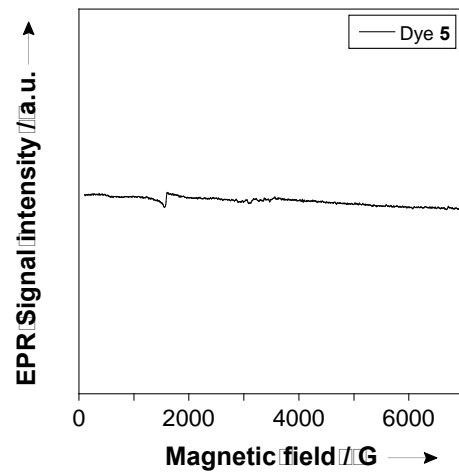

Fig. S18 EPR spectra of dye 5 in water solution.

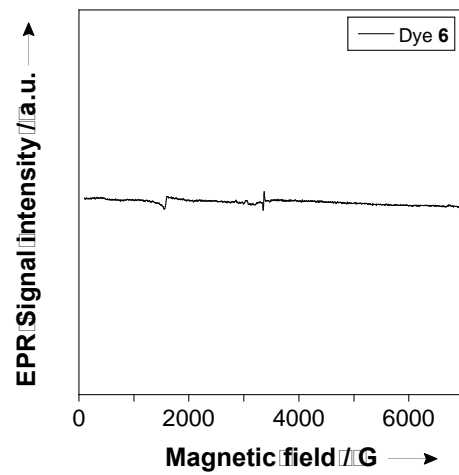

Fig. S19 EPR spectra of dye 6 in water solution.

## 7. Frontier molecular orbitals of dyes 5 and 6 in water solution

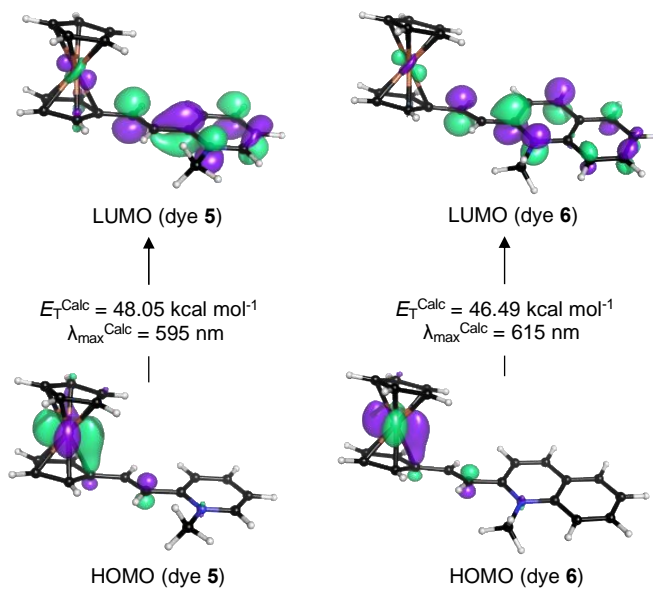

**Fig. S20** Frontier molecular orbitals of dyes **5** and **6** in dichloromethane solution, obtained by the TDDFT B3LYP/def2-TZVP CPCM=water method.



## 8. Dihedral angles of the optimized dyes 3-6 water solution

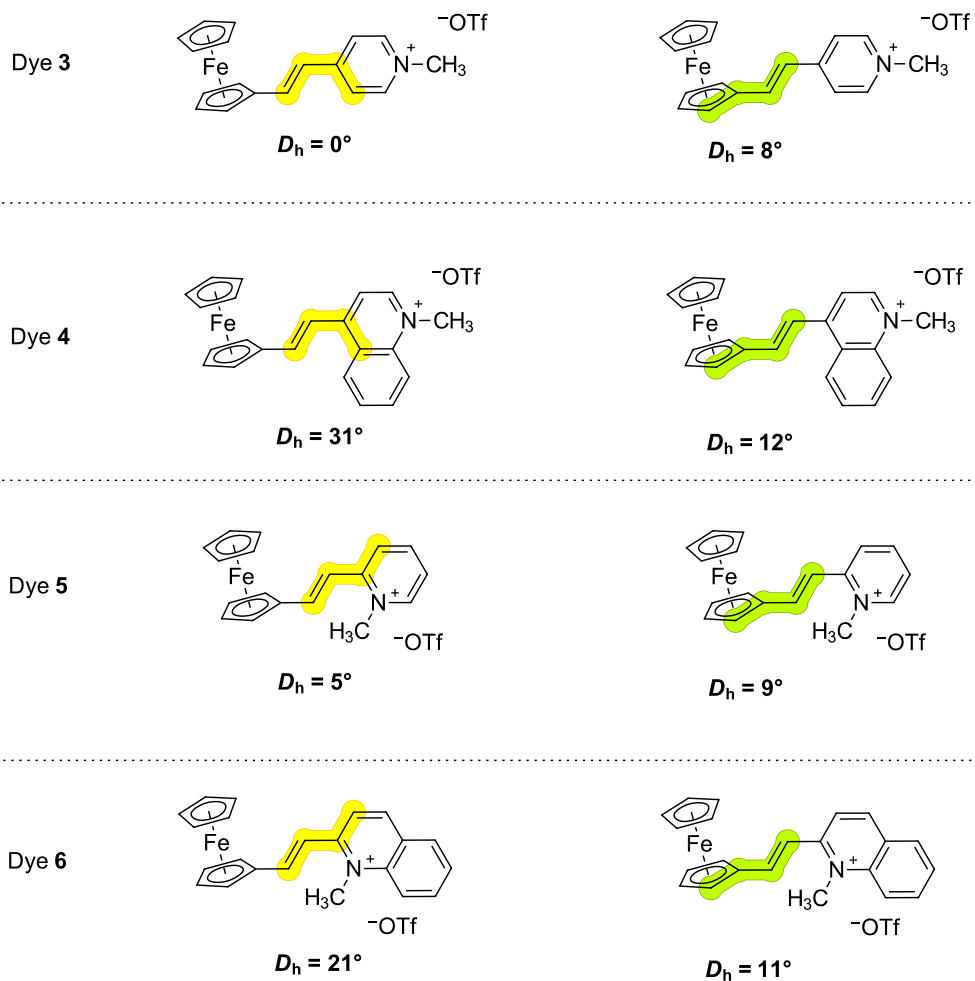

**Fig. S21** Dihedral angles of the optimized structures of dyes 3–6 in water solution, obtained at the B3LYP/def2-TZVP CPCM=water level of theory.

## 9. Absorbance measurements of dye 3–6

**Table S4.** Absorbance of dye 3 in protic solvents at various concentrations.

| Solvent        | [Dye 3] / mol L <sup>-1</sup> | Absorbance | $\lambda_{\text{max}}$ / nm |
|----------------|-------------------------------|------------|-----------------------------|
| Water          | $2.49 \times 10^{-5}$         | 0.131      | 544                         |
|                | $4.13 \times 10^{-5}$         | 0.211      | 545                         |
|                | $5.77 \times 10^{-5}$         | 0.290      | 545                         |
|                | $7.39 \times 10^{-5}$         | 0.379      | 544                         |
|                | $9.00 \times 10^{-5}$         | 0.462      | 545                         |
|                | $1.06 \times 10^{-4}$         | 0.548      | 545                         |
|                | $1.22 \times 10^{-4}$         | 0.620      | 544                         |
| 1,2-Ethanediol | $2.49 \times 10^{-5}$         | 0.089      | 552                         |
|                | $4.13 \times 10^{-5}$         | 0.163      | 552                         |
|                | $5.77 \times 10^{-5}$         | 0.260      | 553                         |
|                | $7.39 \times 10^{-5}$         | 0.345      | 554                         |
|                | $9.00 \times 10^{-5}$         | 0.480      | 552                         |
|                | $1.06 \times 10^{-4}$         | 0.531      | 552                         |
|                | $1.22 \times 10^{-4}$         | 0.615      | 552                         |
| Methanol       | $2.49 \times 10^{-5}$         | 0.142      | 553                         |
|                | $4.13 \times 10^{-5}$         | 0.235      | 554                         |
|                | $5.77 \times 10^{-5}$         | 0.326      | 554                         |
|                | $7.39 \times 10^{-5}$         | 0.418      | 554                         |
|                | $9.00 \times 10^{-5}$         | 0.514      | 554                         |
|                | $1.06 \times 10^{-4}$         | 0.607      | 554                         |
|                | $1.22 \times 10^{-4}$         | 0.696      | 555                         |
| Ethanol        | $2.49 \times 10^{-5}$         | 0.149      | 558                         |
|                | $4.13 \times 10^{-5}$         | 0.246      | 558                         |
|                | $5.77 \times 10^{-5}$         | 0.346      | 558                         |
|                | $7.39 \times 10^{-5}$         | 0.440      | 557                         |
|                | $9.00 \times 10^{-5}$         | 0.538      | 558                         |
|                | $1.06 \times 10^{-4}$         | 0.633      | 558                         |
|                | $1.22 \times 10^{-4}$         | 0.728      | 557                         |
| 1-Propanol     | $2.49 \times 10^{-5}$         | 0.149      | 562                         |
|                | $4.13 \times 10^{-5}$         | 0.248      | 562                         |
|                | $5.77 \times 10^{-5}$         | 0.348      | 562                         |
|                | $7.39 \times 10^{-5}$         | 0.449      | 562                         |
|                | $9.00 \times 10^{-5}$         | 0.552      | 560                         |
|                | $1.06 \times 10^{-4}$         | 0.657      | 562                         |
|                | $1.22 \times 10^{-4}$         | 0.756      | 562                         |
| 1-Butanol      | $2.49 \times 10^{-5}$         | 0.146      | 564                         |
|                | $4.13 \times 10^{-5}$         | 0.247      | 565                         |
|                | $5.77 \times 10^{-5}$         | 0.350      | 564                         |
|                | $7.39 \times 10^{-5}$         | 0.451      | 565                         |
|                | $9.00 \times 10^{-5}$         | 0.546      | 564                         |
|                | $1.06 \times 10^{-4}$         | 0.646      | 564                         |
|                | $1.22 \times 10^{-4}$         | 0.751      | 562                         |
| 1-Hexanol      | $2.49 \times 10^{-5}$         | 0.153      | 563                         |
|                | $4.13 \times 10^{-5}$         | 0.258      | 563                         |
|                | $5.77 \times 10^{-5}$         | 0.350      | 563                         |

|                      |                       |       |     |
|----------------------|-----------------------|-------|-----|
|                      | $7.39 \times 10^{-5}$ | 0.452 | 562 |
|                      | $9.00 \times 10^{-5}$ | 0.552 | 563 |
|                      | $1.06 \times 10^{-4}$ | 0.652 | 563 |
|                      | $1.22 \times 10^{-4}$ | 0.746 | 562 |
| 1-Octanol            | $2.49 \times 10^{-5}$ | 0.158 | 559 |
|                      | $4.13 \times 10^{-5}$ | 0.244 | 560 |
|                      | $5.77 \times 10^{-5}$ | 0.337 | 558 |
|                      | $7.39 \times 10^{-5}$ | 0.436 | 558 |
|                      | $9.00 \times 10^{-5}$ | 0.534 | 556 |
|                      | $1.06 \times 10^{-4}$ | 0.630 | 559 |
|                      | $1.22 \times 10^{-4}$ | 0.728 | 557 |
| 1-Cyclohexanol       | $2.49 \times 10^{-5}$ | 0.173 | 563 |
|                      | $4.13 \times 10^{-5}$ | 0.275 | 562 |
|                      | $5.77 \times 10^{-5}$ | 0.375 | 562 |
|                      | $7.39 \times 10^{-5}$ | 0.513 | 562 |
|                      | $9.00 \times 10^{-5}$ | 0.559 | 560 |
|                      | $1.06 \times 10^{-4}$ | 0.665 | 562 |
|                      | $1.22 \times 10^{-4}$ | 0.782 | 564 |
| <i>tert</i> -Butanol | $2.49 \times 10^{-5}$ | 0.148 | 561 |
|                      | $4.13 \times 10^{-5}$ | 0.246 | 558 |
|                      | $5.77 \times 10^{-5}$ | 0.340 | 559 |
|                      | $7.39 \times 10^{-5}$ | 0.433 | 559 |
|                      | $9.00 \times 10^{-5}$ | 0.526 | 556 |
|                      | $1.06 \times 10^{-4}$ | 0.617 | 559 |
|                      | $1.22 \times 10^{-4}$ | 0.706 | 558 |

**Table S5.** Absorbance of dye **4** in protic solvents at various concentrations.

| Solvent        | [Dye 4] / mol L <sup>-1</sup> | Absorbance | $\lambda_{\max}$ / nm |
|----------------|-------------------------------|------------|-----------------------|
| Water          | $2.49 \times 10^{-5}$         | 0.161      | 592                   |
|                | $4.13 \times 10^{-5}$         | 0.275      | 593                   |
|                | $5.77 \times 10^{-5}$         | 0.389      | 592                   |
|                | $7.39 \times 10^{-5}$         | 0.521      | 593                   |
|                | $9.00 \times 10^{-5}$         | 0.627      | 595                   |
|                | $1.06 \times 10^{-4}$         | 0.740      | 594                   |
|                | $1.22 \times 10^{-4}$         | 0.836      | 594                   |
| 1,2-Ethanediol | $2.49 \times 10^{-5}$         | 0.090      | 603                   |
|                | $4.13 \times 10^{-5}$         | 0.226      | 603                   |
|                | $5.77 \times 10^{-5}$         | 0.353      | 603                   |
|                | $7.39 \times 10^{-5}$         | 0.478      | 603                   |
|                | $9.00 \times 10^{-5}$         | 0.612      | 603                   |
|                | $1.06 \times 10^{-4}$         | 0.737      | 604                   |
|                | $1.22 \times 10^{-4}$         | 0.860      | 602                   |

|            |                       |       |     |
|------------|-----------------------|-------|-----|
| Methanol   | $2.49 \times 10^{-5}$ | 0.202 | 607 |
|            | $4.13 \times 10^{-5}$ | 0.326 | 610 |
|            | $5.77 \times 10^{-5}$ | 0.449 | 609 |
|            | $7.39 \times 10^{-5}$ | 0.584 | 609 |
|            | $9.00 \times 10^{-5}$ | 0.709 | 611 |
|            | $1.06 \times 10^{-4}$ | 0.835 | 609 |
|            | $1.22 \times 10^{-4}$ | 0.960 | 609 |
| Ethanol    | $2.49 \times 10^{-5}$ | 0.186 | 616 |
|            | $4.13 \times 10^{-5}$ | 0.321 | 614 |
|            | $5.77 \times 10^{-5}$ | 0.454 | 612 |
|            | $7.39 \times 10^{-5}$ | 0.580 | 614 |
|            | $9.00 \times 10^{-5}$ | 0.711 | 615 |
|            | $1.06 \times 10^{-4}$ | 0.840 | 615 |
|            | $1.22 \times 10^{-4}$ | 0.968 | 612 |
| 1-Propanol | $2.49 \times 10^{-5}$ | 0.202 | 621 |
|            | $4.13 \times 10^{-5}$ | 0.339 | 624 |
|            | $5.77 \times 10^{-5}$ | 0.471 | 623 |
|            | $7.39 \times 10^{-5}$ | 0.606 | 622 |
|            | $9.00 \times 10^{-5}$ | 0.727 | 620 |
|            | $1.06 \times 10^{-4}$ | 0.856 | 621 |
|            | $1.22 \times 10^{-4}$ | 0.993 | 621 |
| 1-Butanol  | $2.49 \times 10^{-5}$ | 0.207 | 623 |
|            | $4.13 \times 10^{-5}$ | 0.342 | 625 |
|            | $5.77 \times 10^{-5}$ | 0.481 | 625 |
|            | $7.39 \times 10^{-5}$ | 0.612 | 625 |
|            | $9.00 \times 10^{-5}$ | 0.749 | 625 |
|            | $1.06 \times 10^{-4}$ | 0.891 | 622 |
|            | $1.22 \times 10^{-4}$ | 1.029 | 621 |
| 1-Hexanol  | $2.49 \times 10^{-5}$ | 0.211 | 627 |
|            | $4.13 \times 10^{-5}$ | 0.347 | 626 |
|            | $5.77 \times 10^{-5}$ | 0.471 | 625 |
|            | $7.39 \times 10^{-5}$ | 0.606 | 625 |
|            | $9.00 \times 10^{-5}$ | 0.733 | 628 |
|            | $1.06 \times 10^{-4}$ | 0.855 | 624 |
|            | $1.22 \times 10^{-4}$ | 0.996 | 628 |

**Table S5.** Absorbance of dye **5** in protic solvents at various concentrations.

| Solvent | [Dye 5] / mol L <sup>-1</sup> | Absorbance | $\lambda_{\max}$ / nm |
|---------|-------------------------------|------------|-----------------------|
| Water   | $2.49 \times 10^{-5}$         | 0.098      | 531                   |
|         | $4.13 \times 10^{-5}$         | 0.164      | 528                   |
|         | $5.77 \times 10^{-5}$         | 0.234      | 528                   |
|         | $7.39 \times 10^{-5}$         | 0.298      | 530                   |
|         | $9.00 \times 10^{-5}$         | 0.358      | 529                   |
|         | $1.06 \times 10^{-4}$         | 0.424      | 531                   |
|         | $1.22 \times 10^{-4}$         | 0.488      | 530                   |

|                |                       |       |     |
|----------------|-----------------------|-------|-----|
| 1,2-Ethanediol | $2.49 \times 10^{-5}$ | 0.137 | 537 |
|                | $4.13 \times 10^{-5}$ | 0.195 | 537 |
|                | $5.77 \times 10^{-5}$ | 0.252 | 537 |
|                | $7.39 \times 10^{-5}$ | 0.333 | 537 |
|                | $9.00 \times 10^{-5}$ | 0.404 | 539 |
|                | $1.06 \times 10^{-5}$ | 0.475 | 537 |
|                | $1.22 \times 10^{-5}$ | 0.537 | 537 |
| Methanol       | $2.49 \times 10^{-5}$ | 0.115 | 540 |
|                | $4.13 \times 10^{-5}$ | 0.190 | 542 |
|                | $5.77 \times 10^{-5}$ | 0.269 | 541 |
|                | $7.39 \times 10^{-5}$ | 0.349 | 540 |
|                | $9.00 \times 10^{-5}$ | 0.424 | 539 |
|                | $1.06 \times 10^{-4}$ | 0.501 | 539 |
|                | $1.22 \times 10^{-4}$ | 0.579 | 540 |
| Ethanol        | $2.49 \times 10^{-5}$ | 0.116 | 540 |
|                | $4.13 \times 10^{-5}$ | 0.190 | 540 |
|                | $5.77 \times 10^{-5}$ | 0.257 | 542 |
|                | $7.39 \times 10^{-5}$ | 0.327 | 542 |
|                | $9.00 \times 10^{-5}$ | 0.396 | 542 |
|                | $1.06 \times 10^{-4}$ | 0.456 | 542 |
|                | $1.22 \times 10^{-4}$ | 0.527 | 542 |
| 1-Propanol     | $2.49 \times 10^{-5}$ | 0.129 | 546 |
|                | $4.13 \times 10^{-5}$ | 0.208 | 546 |
|                | $5.77 \times 10^{-5}$ | 0.291 | 546 |
|                | $7.39 \times 10^{-5}$ | 0.369 | 546 |
|                | $9.00 \times 10^{-5}$ | 0.446 | 546 |
|                | $1.06 \times 10^{-4}$ | 0.526 | 545 |
|                | $1.22 \times 10^{-4}$ | 0.606 | 546 |
| 1-Butanol      | $2.49 \times 10^{-5}$ | 0.118 | 547 |
|                | $4.13 \times 10^{-5}$ | 0.191 | 547 |
|                | $5.77 \times 10^{-5}$ | 0.278 | 547 |
|                | $7.39 \times 10^{-5}$ | 0.367 | 548 |
|                | $9.00 \times 10^{-5}$ | 0.440 | 548 |
|                | $1.06 \times 10^{-4}$ | 0.525 | 547 |
|                | $1.22 \times 10^{-4}$ | 0.606 | 547 |
| 1-Hexanol      | $2.49 \times 10^{-5}$ | 0.119 | 549 |
|                | $4.13 \times 10^{-5}$ | 0.197 | 549 |
|                | $5.77 \times 10^{-5}$ | 0.284 | 549 |
|                | $7.39 \times 10^{-5}$ | 0.367 | 547 |
|                | $9.00 \times 10^{-5}$ | 0.450 | 549 |
|                | $1.06 \times 10^{-5}$ | 0.537 | 549 |
|                | $1.22 \times 10^{-4}$ | 0.614 | 549 |
| 1-Octanol      | $2.49 \times 10^{-5}$ | 0.117 | 546 |
|                | $4.13 \times 10^{-5}$ | 0.194 | 546 |
|                | $5.77 \times 10^{-5}$ | 0.274 | 546 |
|                | $7.39 \times 10^{-5}$ | 0.343 | 546 |
|                | $9.00 \times 10^{-5}$ | 0.426 | 546 |
|                | $1.06 \times 10^{-4}$ | 0.505 | 543 |
|                | $1.22 \times 10^{-4}$ | 0.566 | 546 |
| 1-Cyclohexanol | $2.49 \times 10^{-5}$ | 0.109 | 546 |

|  |                       |       |     |
|--|-----------------------|-------|-----|
|  | $4.13 \times 10^{-5}$ | 0.208 | 547 |
|  | $5.77 \times 10^{-5}$ | 0.298 | 546 |
|  | $7.39 \times 10^{-5}$ | 0.400 | 546 |
|  | $9.00 \times 10^{-5}$ | 0.506 | 547 |
|  | $1.06 \times 10^{-4}$ | 0.575 | 547 |
|  | $1.22 \times 10^{-4}$ | 0.672 | 546 |

**Table S6.** Absorbance of dye **6** in protic solvents at various concentrations.

| Solvent        | [Dye 6] / mol L <sup>-1</sup> | Absorbance | $\lambda_{\max}$ / nm |
|----------------|-------------------------------|------------|-----------------------|
| Water          | $2.49 \times 10^{-5}$         | 0.128      | 570                   |
|                | $4.13 \times 10^{-5}$         | 0.216      | 574                   |
|                | $5.77 \times 10^{-5}$         | 0.303      | 571                   |
|                | $7.39 \times 10^{-5}$         | 0.393      | 574                   |
|                | $9.00 \times 10^{-5}$         | 0.482      | 572                   |
|                | $1.06 \times 10^{-4}$         | 0.573      | 573                   |
|                | $1.22 \times 10^{-4}$         | 0.661      | 573                   |
| 1,2-Ethanediol | $2.49 \times 10^{-5}$         | 0.116      | 584                   |
|                | $4.13 \times 10^{-5}$         | 0.206      | 583                   |
|                | $5.77 \times 10^{-5}$         | 0.306      | 583                   |
|                | $7.39 \times 10^{-5}$         | 0.387      | 583                   |
|                | $9.00 \times 10^{-5}$         | 0.478      | 583                   |
|                | $1.06 \times 10^{-4}$         | 0.569      | 583                   |
|                | $1.22 \times 10^{-4}$         | 0.721      | 584                   |
| Methanol       | $2.49 \times 10^{-5}$         | 0.135      | 584                   |
|                | $4.13 \times 10^{-5}$         | 0.235      | 583                   |
|                | $5.77 \times 10^{-5}$         | 0.331      | 586                   |
|                | $7.39 \times 10^{-5}$         | 0.420      | 587                   |
|                | $9.00 \times 10^{-5}$         | 0.519      | 584                   |
|                | $1.06 \times 10^{-4}$         | 0.610      | 584                   |
|                | $1.22 \times 10^{-4}$         | 0.696      | 583                   |
| Ethanol        | $2.49 \times 10^{-5}$         | 0.135      | 593                   |
|                | $4.13 \times 10^{-5}$         | 0.225      | 587                   |
|                | $5.77 \times 10^{-5}$         | 0.309      | 589                   |
|                | $7.39 \times 10^{-5}$         | 0.402      | 589                   |
|                | $9.00 \times 10^{-5}$         | 0.485      | 589                   |
|                | $1.06 \times 10^{-4}$         | 0.574      | 592                   |
|                | $1.22 \times 10^{-4}$         | 0.649      | 589                   |
| 1-Propanol     | $2.49 \times 10^{-5}$         | 0.136      | 594                   |
|                | $4.13 \times 10^{-5}$         | 0.243      | 595                   |
|                | $5.77 \times 10^{-5}$         | 0.363      | 596                   |
|                | $7.39 \times 10^{-5}$         | 0.464      | 596                   |
|                | $9.00 \times 10^{-5}$         | 0.570      | 596                   |
|                | $1.06 \times 10^{-4}$         | 0.675      | 594                   |
|                | $1.22 \times 10^{-4}$         | 0.778      | 595                   |
| 1-Butanol      | $2.49 \times 10^{-5}$         | 0.155      | 597                   |

|                |                       |       |     |
|----------------|-----------------------|-------|-----|
|                | $4.13 \times 10^{-5}$ | 0.267 | 598 |
|                | $5.77 \times 10^{-5}$ | 0.377 | 598 |
|                | $7.39 \times 10^{-5}$ | 0.482 | 598 |
|                | $9.00 \times 10^{-5}$ | 0.592 | 598 |
|                | $1.06 \times 10^{-4}$ | 0.706 | 598 |
|                | $1.22 \times 10^{-4}$ | 0.816 | 598 |
| 1-Hexanol      | $2.49 \times 10^{-5}$ | 0.173 | 601 |
|                | $4.13 \times 10^{-5}$ | 0.276 | 601 |
|                | $5.77 \times 10^{-5}$ | 0.388 | 601 |
|                | $7.39 \times 10^{-5}$ | 0.495 | 601 |
|                | $9.00 \times 10^{-5}$ | 0.598 | 600 |
|                | $1.06 \times 10^{-4}$ | 0.714 | 601 |
|                | $1.22 \times 10^{-4}$ | 0.827 | 601 |
| 1-Octanol      | $2.49 \times 10^{-5}$ | 0.157 | 604 |
|                | $4.13 \times 10^{-5}$ | 0.256 | 601 |
|                | $5.77 \times 10^{-5}$ | 0.365 | 602 |
|                | $7.39 \times 10^{-5}$ | 0.493 | 602 |
|                | $9.00 \times 10^{-5}$ | 0.589 | 602 |
|                | $1.06 \times 10^{-4}$ | 0.703 | 603 |
|                | $1.22 \times 10^{-4}$ | 0.797 | 601 |
| 1-Cyclohexanol | $2.49 \times 10^{-5}$ | 0.153 | 603 |
|                | $4.13 \times 10^{-5}$ | 0.236 | 602 |
|                | $5.77 \times 10^{-5}$ | 0.354 | 603 |
|                | $7.39 \times 10^{-5}$ | 0.469 | 602 |
|                | $9.00 \times 10^{-5}$ | 0.594 | 602 |
|                | $1.06 \times 10^{-4}$ | 0.751 | 602 |
|                | $1.22 \times 10^{-4}$ | 0.832 | 599 |

## 10. Absorption coefficients of dyes 3–6 in protic solvents

**Table S7.** Absorption coefficients  $\epsilon$  in  $\text{L mol}^{-1} \text{cm}^{-1}$  of dyes 3–6 in protic solvents.

| Solvent              | Dye 3  | Dye 4          | Dye 5          | Dye 6          |
|----------------------|--------|----------------|----------------|----------------|
| Water                | 5103.2 | 7052.3         | 4004.7         | 5497.4         |
| 1,2-Ethanediol       | 5585.0 | 7928.9         | 4220.9         | 5995.0         |
| Methanol             | 5722.7 | 7843.1         | 4782.6         | 5785.9         |
| Ethanol              | 5968.1 | 8037.6         | 4202.4         | 5329.1         |
| 1-Propanol           | 6281.8 | 8088.2         | 4908.2         | 6612.2         |
| 1-Butanol            | 6200.2 | 8461.3         | 5066.2         | 6786.3         |
| 1-Hexanol            | 6113.3 | 8018.6         | 5151.4         | 6730.1         |
| 1-Octanol            | 5917.5 | — <sup>a</sup> | 4679.6         | 6709.0         |
| Cyclohexanol         | 6153.7 | — <sup>a</sup> | 5809.9         | 7303.6         |
| <i>tert</i> -butanol | 5741.4 | — <sup>a</sup> | — <sup>a</sup> | — <sup>a</sup> |

<sup>a</sup>Not recorded because the dye exhibited positive solvatochromism in this solvent.

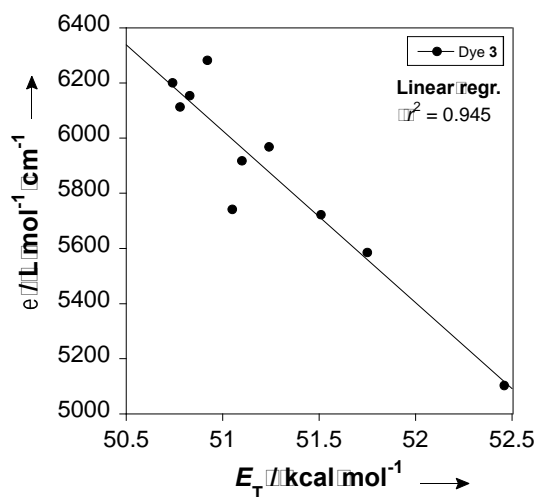

**Fig. S22** Correlation of the molar absorption coefficient at the UV/Vis peak maximum, as the function of the electronic transition energy  $E_T$  of dye 3 in all the solvents where this dye displays negative solvatochromism.



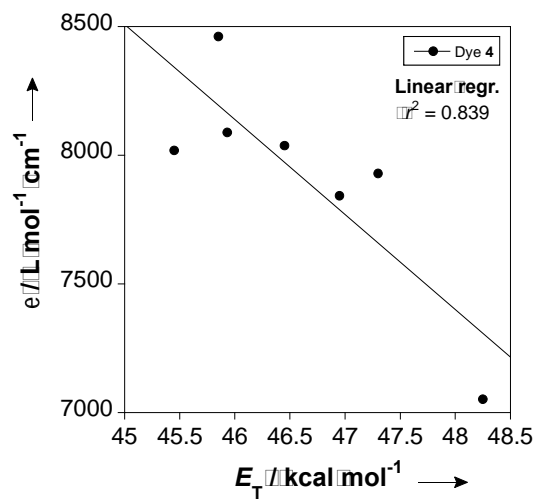

**Fig. S23** Correlation of the molar absorption coefficient at the UV/Vis peak maximum, as the function of the electronic transition energy  $E_T$  of dye **4** in all the solvents where this dye displays negative solvatochromism.

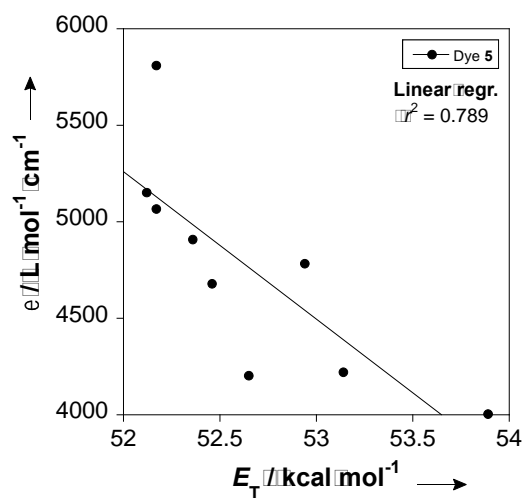

**Fig. S24** Correlation of the molar absorption coefficient at the UV/Vis peak maximum, as the function of the electronic transition energy  $E_T$  of dye **5** in all the solvents where this dye displays negative solvatochromism.

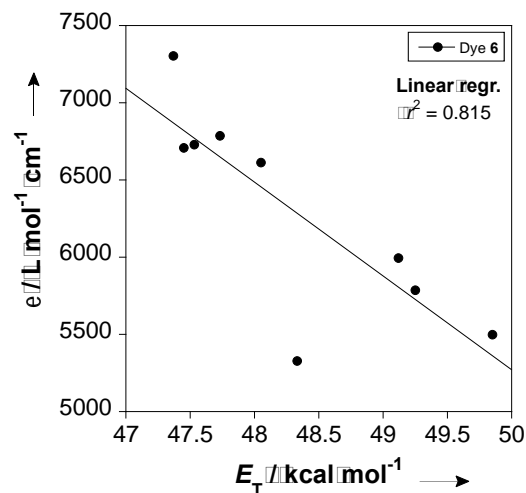

**Fig. S25** Correlation of the molar absorption coefficient at the UV/Vis peak maximum, as the function of the electronic transition energy  $E_T$  of dye **6** in all the solvents where this dye displays negative solvatochromism.

## 9. References

- 1 S. R. Marder, J. W. Perry, B. G. Tiemann and W. P. Schaefer, *Organometallics*, 1991, **10**, 1896–1901.
- 2 J. A. Cabeza, I. del Río, E. Pérez-Carreño, M. G. Sánchez-Vega and D. Vázquez-García, *Organometallics*, 2010, **29**, 4464–4471.
- 3 J. A. Bautista-Martinez, L. Tang, J.-P. Belieres, R. Zeller, C. A. Angell and C. Friesen, *J. Phys. Chem. C Nanomater. Interfaces*, 2009, **113**, 12586–12593.
- 4 A. Motaleb, A. Bera and P. Maity, *Org. Biomol. Chem.*, 2018, **16**, 5081–5085.
- 5 H. Neelakantan, H.-Y. Wang, V. Vance, J. D. Hommel, S. F. McHardy and S. J. Watowich, *J. Med. Chem.*, 2017, **60**, 5015–5028.
- 6 A. D. Becke, *Phys. Rev. A Gen. Phys.*, 1988, **38**, 3098–3100.
- 7 J. P. Perdew, *Phys. Rev. B Condens. Matter*, 1986, **33**, 8822–8824.
- 8 F. Weigend and R. Ahlrichs, *Phys. Chem. Chem. Phys.*, 2005, **7**, 3297.
- 9 S. Grimme, J. Antony, S. Ehrlich and H. Krieg, *J. Chem. Phys.*, 2010, **132**, 154104.
- 10 R. Ahlrichs, M. Bär, M. Häser, H. Horn and C. Kölmel, *Chem. Phys. Lett.*, 1989, **162**, 165–169.
- 11 V. Barone and M. Cossi, *J. Phys. Chem. A*, 1998, **102**, 1995–2001.
- 12 K. Eichkorn, O. Treutler, H. Öhm, M. Häser and R. Ahlrichs, *Chem. Phys. Lett.*, 1995, **242**, 652–660.
- 13 F. Weigend, *Phys. Chem. Chem. Phys.*, 2006, **8**, 1057–1065.
- 14 F. Neese, F. Wennmohs, A. Hansen and U. Becker, *Chem. Phys.*, 2009, **356**, 98–109.
- 15 F. Neese, *WIREs Comput Mol Sci*, 2018, **8**, 33.
